# Supplementary material
Source: PubMed Central journal article supplement (PMC6880911)

## Supplemental information

### **CAR T cell therapy is effective for CD19-dim B-lymphoblastic leukemia but is impacted by prior blinatumomab therapy**

Vinodh Pillai<sup>1\*</sup>, Kavitha Muralidharan<sup>2</sup>, Wenzhao Meng<sup>1</sup>, Asen Bagashev<sup>1</sup>, Derek A. Oldridge<sup>1</sup>, Jaclyn Rosenthal<sup>2</sup>, John Van Arnam<sup>1</sup>, Jos J. Melenhorst<sup>1</sup>, Amanda M. DiNofia<sup>4</sup>, Minjie Luo<sup>1</sup>, Sindhu Cherian<sup>3</sup>, Jonathan R. Fromm<sup>3</sup>, Gerald Wertheim<sup>1</sup>, Andrei Thomas-Tikhonenko<sup>1</sup>, Michele Paessler<sup>1</sup>, C.H. June<sup>1</sup>, Eline T. Luning Prak<sup>1</sup>, Vijay G. Bhoj<sup>1</sup>, Stephan A. Grupp<sup>4</sup>, Shannon L. Maude<sup>4\*\*</sup>, and Susan R. Rheingold<sup>4\*\*</sup>

<sup>1</sup>Department of Pathology and Laboratory Medicine, University of Pennsylvania.

<sup>2</sup>Perelman School of Medicine at the University of Pennsylvania, Philadelphia, PA.

<sup>3</sup>Department of Laboratory Medicine, University of Washington.

<sup>4</sup>Division of Oncology, Cancer Immunotherapy Program, Children's Hospital of Philadelphia.

\*\*Equal contribution

**\*Corresponding author:** Vinodh Pillai, The Children's Hospital of Philadelphia, 3400 Civic Center Blvd, Philadelphia, PA 19104, Phone: 215-590-1890, Email: pillai1@email.chop.edu.

## Genetic analyses

Chromosome analysis by Giemsa-trypsin banding was performed on metaphase spreads prepared from unstimulated bone marrow or peripheral blood samples after 24-48 hours of culture. Fluorescence in situ hybridization (FISH) analyses using a series of probe set for *ETV6/RUNX1*, *KMT2A/MLL*, *BCR/ABL1*, *CRLF2*, and centromeres 4 and 10 were performed per modified Children's Oncology Group protocol. Genomic DNA and RNA for next generation sequencing (NGS) and single nucleotide polymorphism (SNP) array analyses were extracted from uncultured samples. Library preparation for DNA-based NGS panel and RNA-based fusion panel was performed using customized SureSelectQXT (Agilent) and Archer™ FusionPlex (Archer) kits respectively per manufacturer instructions. Sequencing was performed on Illumina MiSeq or HiSeq 2500 instruments. The NGS panels interrogate 118 genes for sequence and copy number variants (CNV) and 110 genes for known and novel fusions. Genome-wide SNP array analysis was performed using Illumina Human Bead Chips. *CD19* gene locus at 16p11.2, chr16:28,943,260-28,950,668 (hg19) was examined for deletions. *CD19* gene Sanger sequencing and analysis was performed as reported.<sup>15</sup> Sanger chromatograms were visualized using the Bioconductor package, *sangerseqR* (version 1.14.0), through in the R programming language (version 3.4.4). Base calling for coding exons and intronic splice donor/acceptor sites was performed using the *makeBaseCalls* function of *sangerseqR* with parameter *ratio=0.15*. All mutations were manually reviewed and were only called when supported by bi-directional Sanger tracings.

## Cell lines

K562 and Nalm6 cells were purchased from ATCC and cultured in RPMI medium with 10% Fetal Bovine Serum (Sigma), 1% Heps (Gibco) and 1% Penicillin/Streptomycin antibiotic (Gibco).

K562 and Nalm6 cells were each transduced with a lentiviral vector encoding click beetle green luciferase for use in luciferase-based cytotoxicity assays.

## Supplemental table and figure legends

**Supplemental table 1.** Flow cytometric panels and antibodies used in clinical flow cytometry at the Children's Hospital of Philadelphia.

**Supplemental Figure 1.** CAR T cell killing of control Nalm6 and CD19 mRNA transduced K562 cells at various effector: target ratios are shown.

**Supplemental figure 2.** MRD level CD19-negative populations before CAR T-cell therapy. a. Sequential gating of CD10<sup>+</sup> CD58<sup>bright</sup> CD20<sup>variable</sup> blasts (red) in HP-10 (no recurrence) revealed 0.07% CD19-negative blasts before CAR infusion. Negative control gate was based on internal CD3<sup>+</sup> T cells (teal) b. Sequential gating of CD10<sup>+</sup> CD34<sup>dim</sup> CD38<sup>dim</sup> blasts in HP-102 revealed 0.76% CD19-negative blasts before CAR infusion. Patient recurred with CD19-negative leukemia 3 months after infusion. c. Sequential gating of CD10<sup>+</sup> CD38<sup>dim</sup> CD58<sup>bright</sup> blasts in HP-6 revealed 0.07% CD19-negative blasts before CAR infusion. Patient recurred with CD19-positive leukemia 12 months after infusion. d. Proportion of CD19-negative blasts among total blasts in the remission, CD19-posMRD/Relapse and CD19-negMRD/Relapse groups

**Supplemental figure 3. Morphologic and immunophenotypic comparison of representative KMT2A rearranged leukemia with ALL to AML switch (HP-78).** Pre-CAR CD45dim lymphoblasts (a) with multiple B cell antigens (CD19, CD22) showed switch to myeloid lineage by morphology (increased size and cytoplasm) and immunophenotype (CD13, CD33, loss of CD19 and CD22) post-CAR T-cell therapy.

**Supplementary data file.** Sequences of Dominant Antibody Heavy Chain Rearrangements. Data from individual (biological) replicates are shown on the highest copy number gene rearrangement from each sequencing library. The dominant clone ID refers to its copy number rank in the library (1 = highest copy number rearrangement; 2 = second highest copy number rearrangement). Total reads indicate the number of valid reads in the sample. Freq. refers to the frequency of the dominant rearrangement in the sample, expressed as a fraction. V, D and J provide the most similar germline variable, diversity and joining gene segments, respectively. CDR3aa provides the amino acid sequence of the third complementarity determining region. CDR3nt provides the nucleotide sequence of the CDR3. Functional indicates whether the rearrangement is productive or non-productive (in the latter case, rearrangements are non-productive either by virtue of being out of frame or having a premature termination codon or both). The raw nucleotide sequence of the rearrangement is also provided.

Supplementary table 1. Flow cytometric panels and antibodies used.

| Tube #             | FTTC                  | PE                    | ECD                  | PC5.5 /<br>PerCP-Cy5.5             | PC7                 | APC                 | APC-AF700          | APC-AF750          | Pacific Blue       | Krome Orange      |
|--------------------|-----------------------|-----------------------|----------------------|------------------------------------|---------------------|---------------------|--------------------|--------------------|--------------------|-------------------|
|                    | MingD1<br>BC IM0370U  | MingD1<br>BC IM0370U  | MingD1<br>BC IM0714U | MingD2a<br>BC A1262                | MingD2a<br>BC A1262 | MingD1<br>BC IM075U | MingD1<br>BC A1118 | MingD1<br>BC A1120 | MingD1<br>BC A1120 | CD45<br>BC A9A416 |
| 1                  | PerCP-Cy5.5<br>D19A34 | Lin-biotin<br>D19A37  | CD28<br>BC IM0607    | CD38<br>(PerCP-Cy5.5)<br>BD 556050 | CD5<br>BC A4337S    | CD22<br>BC A62791   | CD19<br>BC A3837   | CD19<br>BC A8310   | IgM<br>BC B36566   | CD45<br>BC A9A416 |
| 2                  | CD2<br>BC B36533      | CD30<br>INV 12-030-42 | CD7<br>BC A70202     | CD3<br>BC A8327                    | CD5<br>BC A537S     | CD56<br>BD 341026   | CD34<br>BC A8354   | CD4<br>BC A56655   | CD8<br>BC A82791   | CD45<br>BC A9A416 |
| 3                  | CD9<br>BD 341506      | CD70<br>BD 340620     | CD7<br>BC A70202     |                                    | CD5<br>BC A537S     | CD19<br>BC IM0545   | CD34<br>BC A8354   | CD4<br>BC A56655   | CD8<br>BC A82791   | CD45<br>BC A9A416 |
| 4                  | CD13<br>BC IM0778U    | CD33<br>BD 340679     | HLA-DR<br>BC IM0636  | CD5<br>BC A4337S                   | CD5<br>BC A4337S    | CD45<br>BC IM0701   | CD34<br>BC A8354   |                    |                    | CD45<br>BC A9A416 |
| 5                  | CD13<br>BC IM0778U    | CD33<br>BD 340679     | HLA-DR<br>BC IM0636  | CD38<br>(PerCP-Cy5.5)<br>BD 556050 | CD19<br>BC IM038U   | CD117<br>BC IM0636  | CD34<br>BC A8354   | CD71<br>BC A8313   | CD15<br>BC A1A775  | CD45<br>BC A9A416 |
| 6                  | CD13<br>BC IM0778U    |                       | HLA-DR<br>BC IM0636  | CD38<br>(PerCP-Cy5.5)<br>BD 556050 | CD64<br>BC B00325   | CD123<br>BC B00376  | CD34<br>BC A8354   | CD4<br>BC A56655   | CD14<br>BC B00348  | CD45<br>BC A9A416 |
| 7                  |                       | CD33<br>BD 340679     |                      | CD38<br>(PerCP-Cy5.5)<br>BD 556050 | CD5<br>BC A537S     | CD56<br>BD 341026   | CD34<br>BC A8354   |                    | CD7<br>BC B06469   | CD45<br>BC A9A416 |
| 8                  | CD33a<br>BC IM0270U   | CD33<br>BD 340679     | HLA-DR<br>BC IM0636  | CD45<br>BC A70388                  | CD64<br>BC B00325   | CD133<br>BC B00376  | CD34<br>BC A8354   | CD71<br>BC A8313   | CD56<br>BC B08184  | CD45<br>BC A9A416 |
| 9                  | CD42b<br>BC IM0648U   | CD34<br>BC IM1438U    |                      | CD33<br>BC A70198                  | CD81<br>BC IM03716  | CD41<br>BC B15884   |                    | CD10<br>BC A8310   | CD15<br>BC A1A775  | CD45<br>BC A9A416 |
| Cytoplasmic        | TdT<br>BC M0354       | MPO<br>BC IM0465U     | CD3<br>BC IM0705U    | CD22<br>BC A74168                  | CD22<br>BC A74168   | CD79a<br>BC A60793  |                    |                    | IgM<br>BC B36566   | CD45<br>BC A9A416 |
| Limited CART panel | CD68<br>BC IM0331U    | CD34<br>BC IM1438U    | CD3<br>BC IM0637     | CD3<br>BC A8327                    | CD15<br>BC IM038U   | CD22<br>BC A60791   | CD34<br>BC A8354   | CD15<br>BC A8310   |                    | CD45<br>BC A9A416 |

Vendor abbreviations followed by catalog numbers; BC = Beckman Coulter, BD = Becton Dickinson, D = Dako-Agilent, Inv = Invitrogen;

Supplemental figure 1.

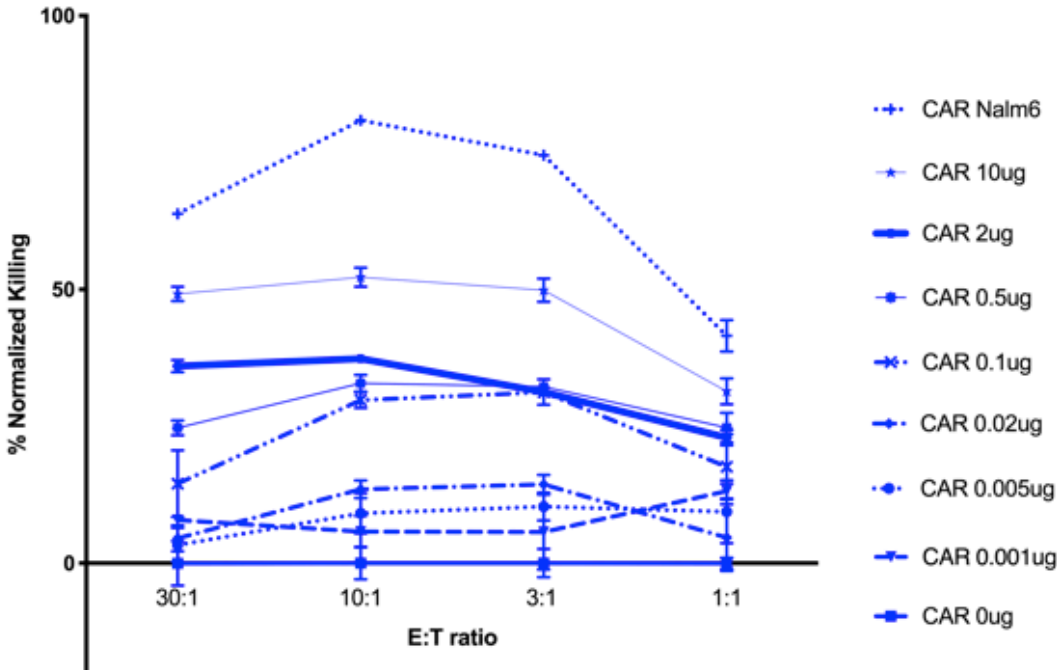

Supplemental figure 2.

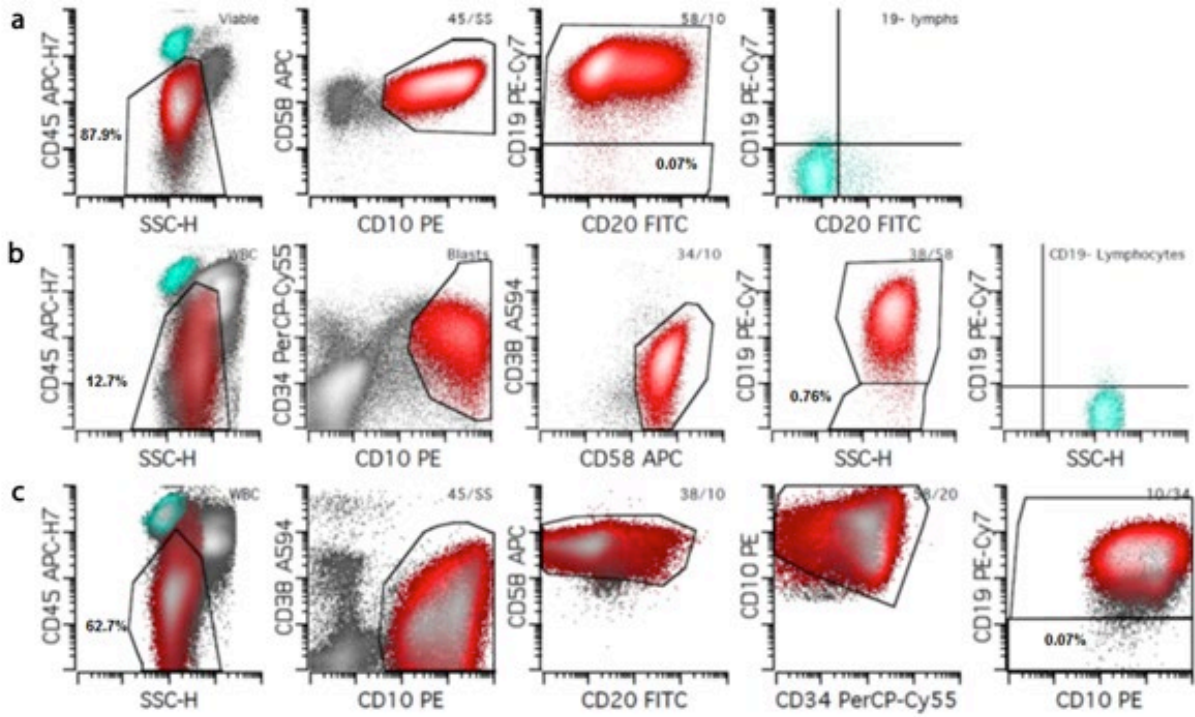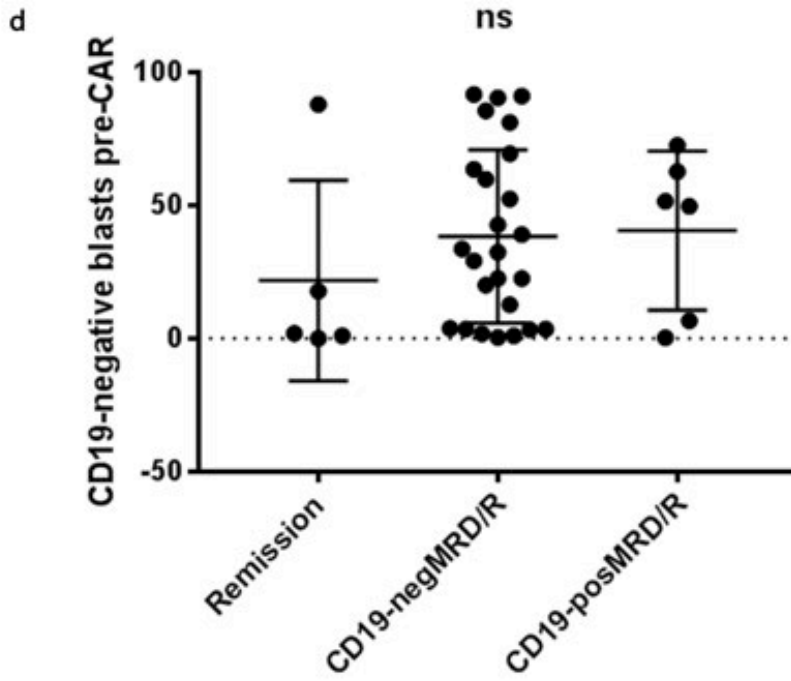

Supplemental figure 3.

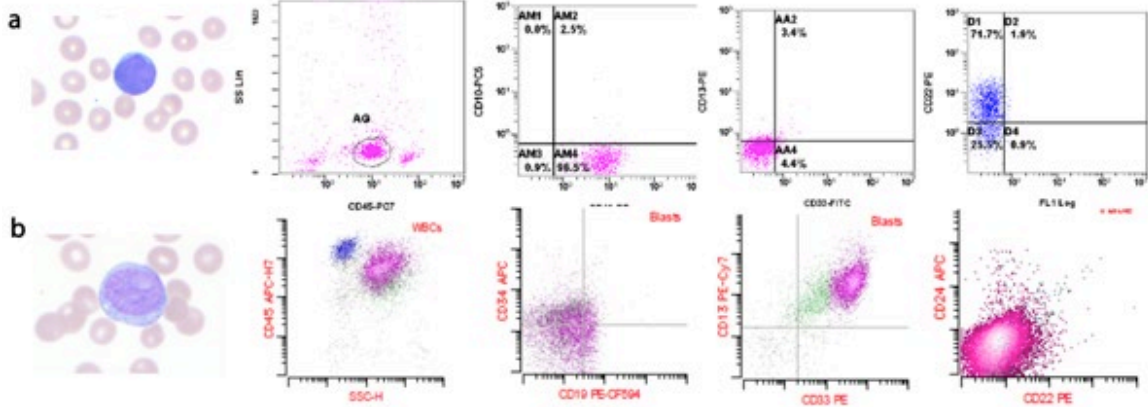

Supplement: baADV2019000692-suppl1.pdf [file baADV2019000692-suppl1.pdf]
